# Supplementary material for: Spatial, Geographical, Climatic, and Edaphic Influences on Moss Community Structure: A Case Study from Qinhuangdao, China
Source: MDPI journal article supplement (doi:10.3390/f15030424), 2024-02-22
Supplement: s1 [file s1]

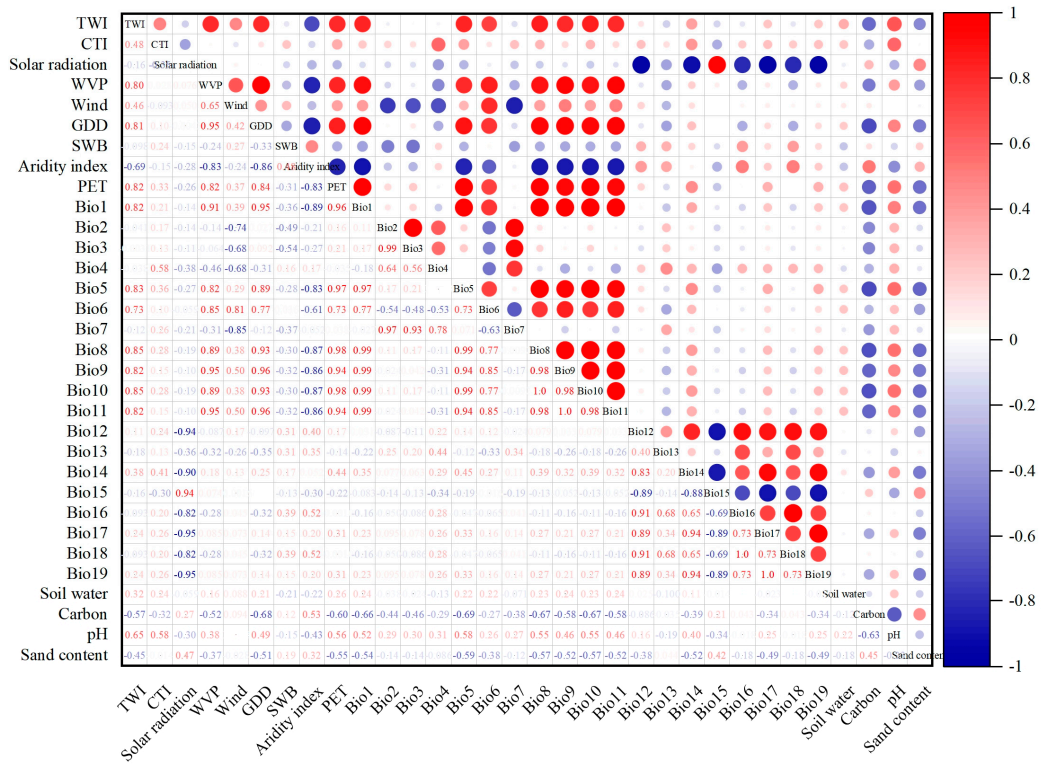

**Figure S1.** Correlations between environmental factors. The figure illustrates pairwise comparisons between environmental factors, using a color gradient to represent Pearson's correlation coefficient. TWI, topographic wetness index; CTI, compound topographic index; WVP, water vapor pressure; GDD, annual mean growing degree days; SWB, site water balance. PET, potential evapotranspiration; Bio1, annual mean temperature; Bio2, mean diurnal range; Bio3, isothermality; Bio4, temperature seasonality; Bio5, max temperature of warmest month; Bio6, min temperature of coldest month; Bio7, temperature annual range; Bio8, mean temperature of wettest quarter; Bio9, mean temperature of driest quarter; Bio10, mean temperature of warmest quarter; Bio11, mean temperature of coldest quarter; Bio12, annual precipitation; Bio13, precipitation of wettest month; Bio14, precipitation of driest month; Bio15, precipitation seasonality; Bio16, precipitation of wettest quarter; Bio17, precipitation of driest quarter; Bio18, precipitation of warmest quarter; Bio19, precipitation of coldest quarter.

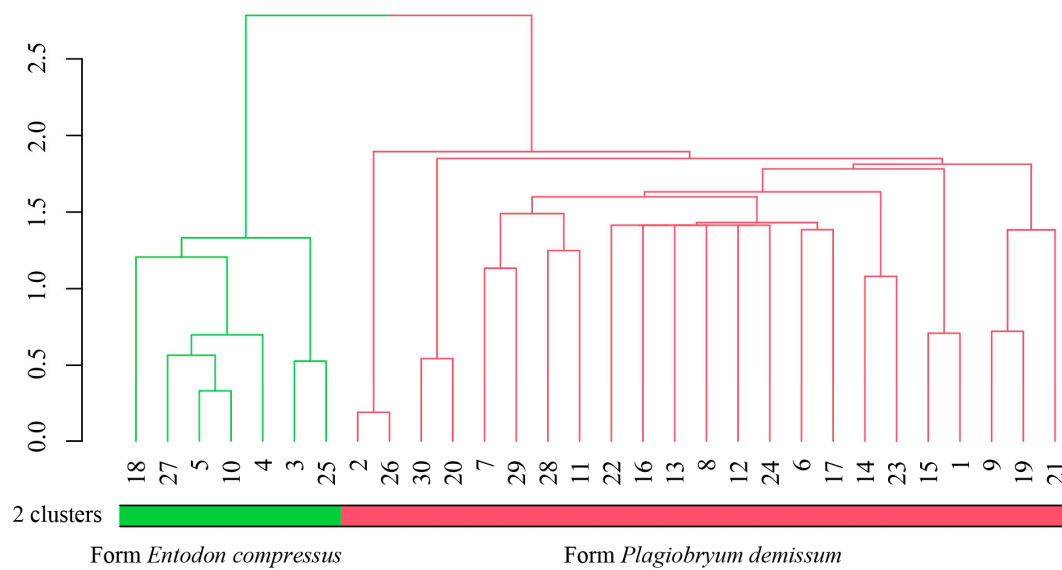

**Figure S2.** Cluster tree of sample plot based on environmental factors. There are 2 forms, and colors represent forms. The numbers represent the 30 plot numbers.

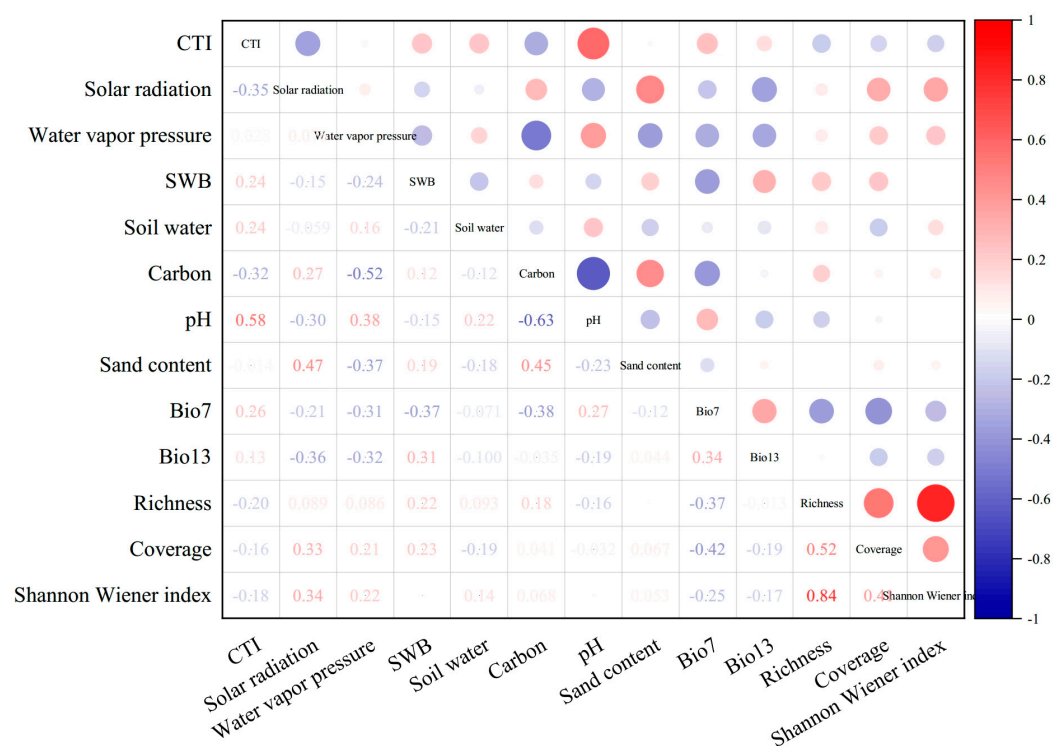

**Figure S3.** Correlations between environment variables and moss diversity. The figure illustrates pairwise comparisons between environmental factors, using a color gradient to represent Pearson's correlation coefficient. CTI, compound topographic index; WVP, water vapor pressure; SWB, site water balance. Bio7, temperature annual range; Bio13, precipitation of wettest month.

**Table S1.** Relative coverage, relative frequency, and importance values of dominant species in different cluster.

| Cluster | Dominant species                 | Relative frequency | Relative coverage | Important value |
|---------|----------------------------------|--------------------|-------------------|-----------------|
| I       | <i>Entodon compressus</i>        | 0.2188             | 0.4108            | 0.3148          |
| I       | <i>Entodon smaragdinus</i>       | 0.0938             | 0.1578            | 0.1258          |
| I       | <i>Plagiomnium succulentum</i>   | 0.0625             | 0.1777            | 0.1201          |
| II      | <i>Plagiobryum demissum</i>      | 0.0574             | 0.0734            | 0.0654          |
| II      | <i>Hyophila nymmaniana</i>       | 0.0574             | 0.0724            | 0.0649          |
| II      | <i>Trichostomum platyphyllum</i> | 0.0328             | 0.0968            | 0.0648          |
